# Supplementary material for: MONITORING OF IODINE-131 IN AIR USING ACTIVATED CHARCOAL
Source: Springer Nature journal article supplement (doi:10.1038/s41467-022-30548-5), 1961-01-01
Supplement: 41467_2022_30548_MOESM1_ESM.pdf [file 41467_2022_30548_MOESM1_ESM.pdf]

## Supplementary Information

### Universal protein misfolding intermediates can bypass the proteostasis network and remain soluble and less functional

Daniel A. Nissley<sup>1,†</sup>, Yang Jiang<sup>1,†</sup>, Fabio Trovato<sup>1</sup>, Ian Sitarik<sup>1</sup>, Karthik B. Narayan<sup>1</sup>, Philip To<sup>2</sup>, Yingzi Xia<sup>2</sup>, Stephen Fried<sup>2,3</sup>, Edward P. O'Brien<sup>1,4,5\*</sup>

<sup>1</sup>Department of Chemistry, Pennsylvania State University, University Park, PA 16802, USA

<sup>2</sup>Department of Chemistry, Johns Hopkins University, Baltimore, MD 21218, USA

<sup>3</sup>Thomas C. Jenkins Department of Biophysics, Johns Hopkins University, Baltimore, MD 21218, USA

<sup>4</sup>Bioinformatics and Genomics Graduate Program, The Huck Institutes of the Life Sciences, Pennsylvania State University, University Park, PA 16802, USA

<sup>5</sup>Institute for Computational and Data Sciences, Pennsylvania State University, University Park, PA 16802, USA

<sup>†</sup>These authors contributed equally to this research project

\* to whom correspondence should be addressed: epo2@psu.edu

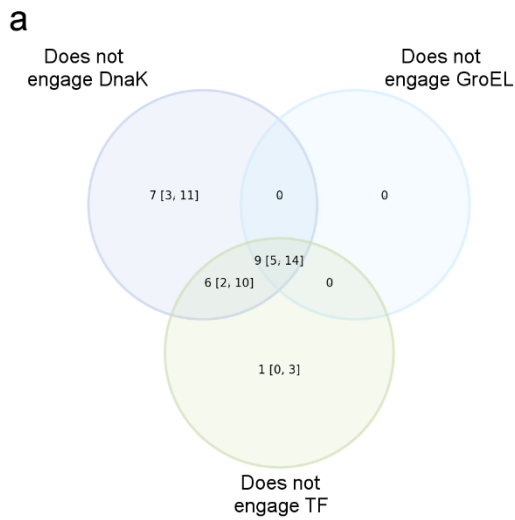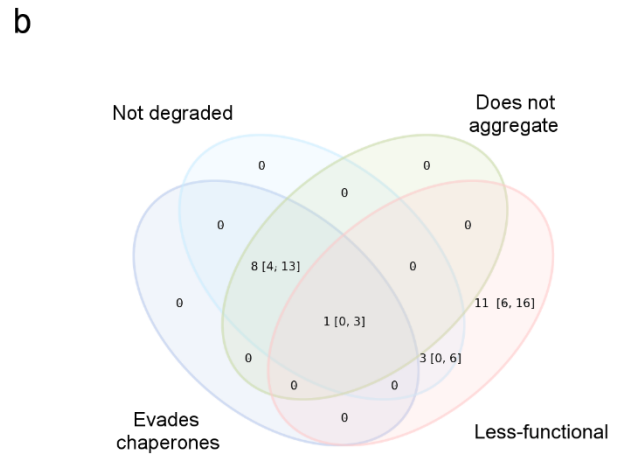

**Supplementary Figure 1.** Venn diagrams showing the overlap between Luciferase trajectories that are misfolded and (a) predicted to evade DnaK, GroEL, and TF or (b) predicted not to aggregate, not to be degraded, to evade all chaperones, and to remain non-functional. Error bars are 95% confidence intervals from bootstrapping  $10^6$  times.

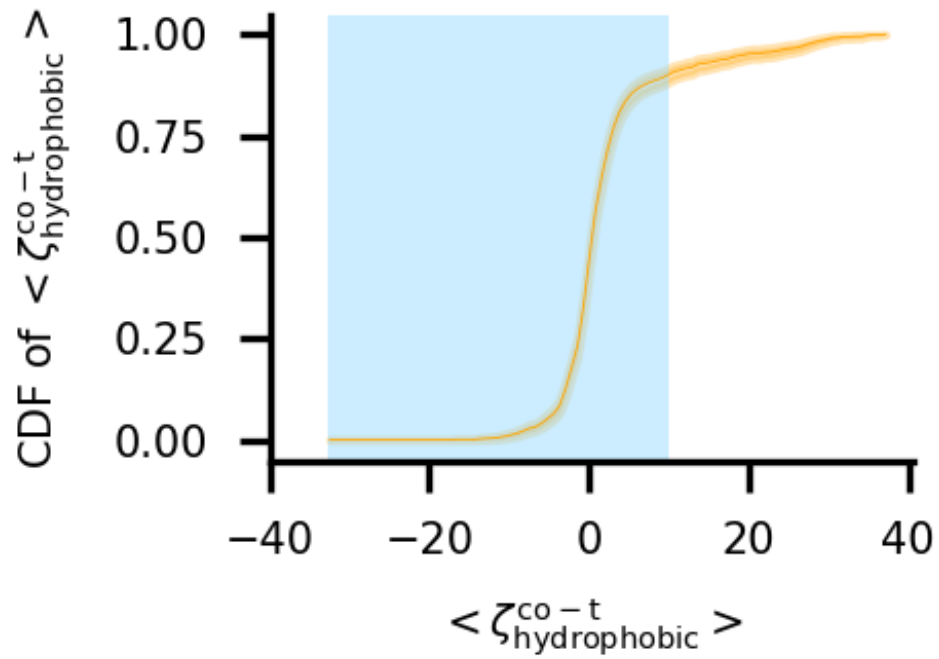

**Supplementary Figure 2.** Cumulative distribution function of  $\langle \zeta_{\text{hydrophobic}}^{\text{co-t}} \rangle$  over the subset of 1,053 misfolded trajectories for which it was computed (see Methods). The blue shaded region indicates the subset of values taken to indicate no significant increase in trigger factor interactions relative to the folded population. The height of the CDF indicates the 95% confidence intervals.

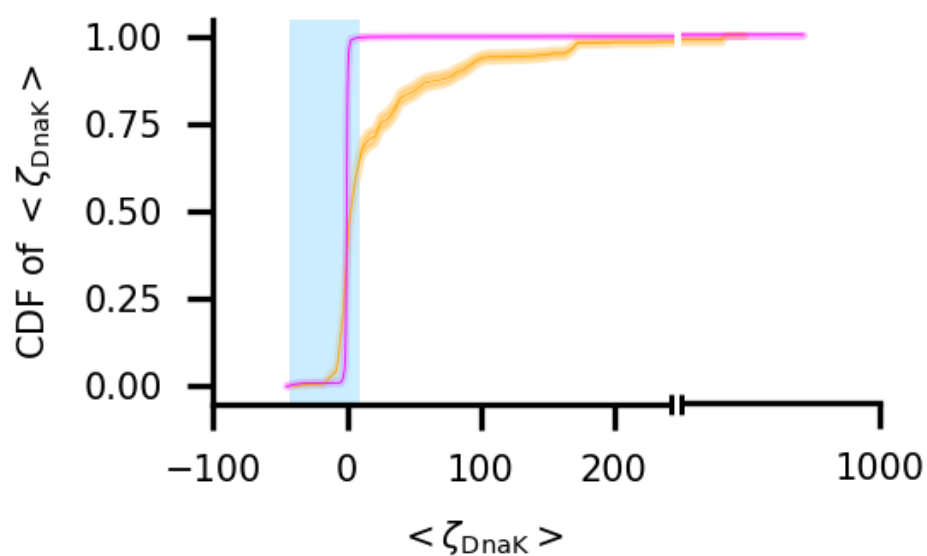

**Supplementary Figure 3.** Cumulative distribution function of  $\langle \zeta_{\text{DnaK}} \rangle$  over the subset of 1,631 misfolded (orange) and 4,469 folded (magenta) trajectories. The blue shaded region indicates the subset of values taken to indicate no significant increase in DnaK interactions relative to the native-state population. The height of the CDFs indicates the 95% confidence intervals.

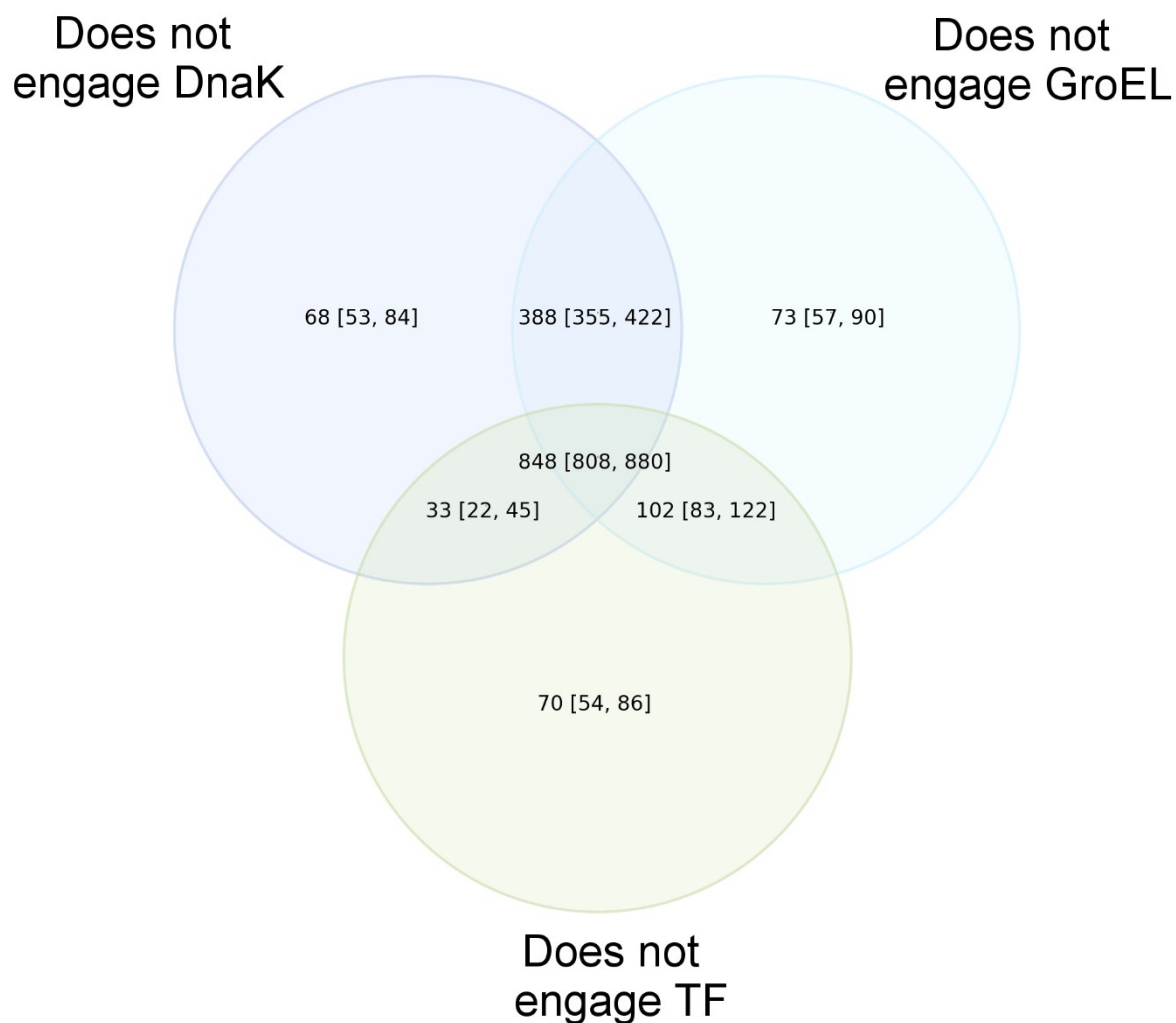

**Supplementary Figure 4.** Venn diagram showing the overlap between those trajectories that are predicted not to engage TF, DnaK, or GroEL/GroES. A total of 1,582 trajectories evade at least one chaperone. Error bars are 95% confidence intervals from bootstrapping  $10^6$  times.

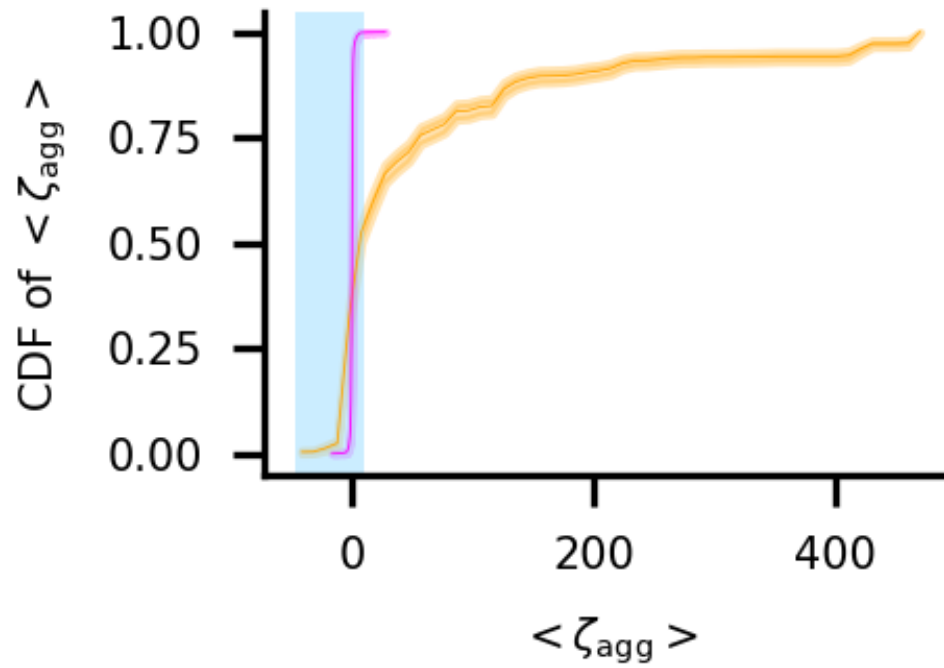

**Supplementary Figure 5.** Cumulative distribution function of  $\langle \zeta_{Agg} \rangle$  over the subset of 1,631 misfolded (orange) and 4,469 folded (magenta) trajectories. The blue shaded region indicates the subset of values taken to indicate no significant increase in aggregation propensity relative to the native state simulations. The height of the CDFs indicates the 95% confidence intervals.

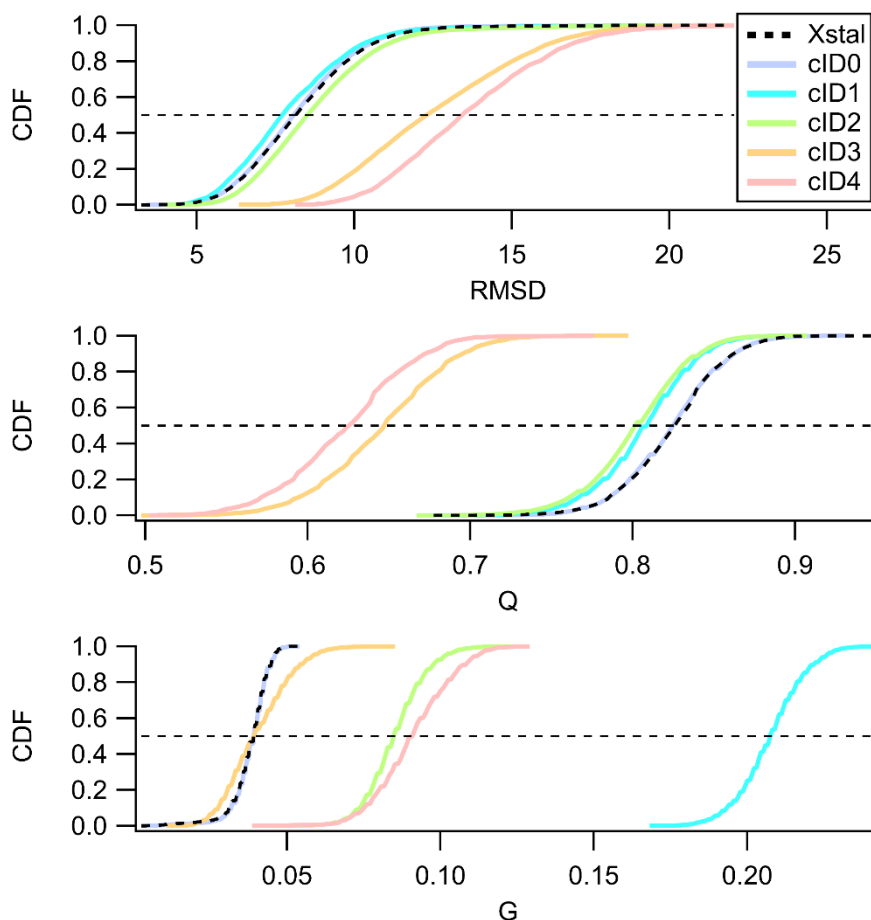

**Supplementary Figure 6.** The utility of the change in entanglement metric ( $G$ ) for detecting structural perturbations not apparent by fraction of native contacts ( $Q$ ) or root mean square deviation (RMSD) is exemplified by examining clusters of the trajectories for aminoimidazole ribonucleotide synthetase (PDB: 1CLI) relative to the cluster of trajectories started from the reference state. The 50 trajectories obtained from synthesis simulations can be clustered into 5 separate clusters characterized by the  $\langle Q_{\text{mode}} \rangle$  and the corrected discrete distribution of a give type of change in entanglement (Eq. 7). cID0 contains 8/50 trajectories all of which terminate to the native state with no changes in entanglement. cID1 contains 3/50 trajectories that are near native like (i.e.  $\langle Q_{\text{mode}} \rangle \approx \langle Q_{\text{mode}}^{NS} \rangle$ ) that show appreciable gain and loss of entanglements as well as pure switch in chirality. cID2 contains 32/50 trajectories that show appreciable gain and loss of entanglements with less near native like conformations (i.e.  $\langle Q_{\text{mode}} \rangle \geq \langle Q_{\text{mode}}^{NS} \rangle - \sigma(Q_{\text{mode}}^{NS})$ ). cID3 contains 6/50 trajectories that show non-native like conformations (i.e.  $\langle Q_{\text{mode}} \rangle < \langle Q_{\text{mode}}^{NS} \rangle - \sigma(Q_{\text{mode}}^{NS})$ ) with appreciable gain and loss of entanglements. cID4 contains 1/50 trajectories that show non-native like conformations with appreciable gain and loss of entanglements and pure change in chirality. For the clusters which contain near native like conformations and changes in entanglement of any kind (cID1 light blue and cID2)  $Q$  and RMSD fail to distinguish different clusters while  $G$  does not. For those clusters that contain non-native like conformations and changes in entanglement of any kind (cID3 & cID4)  $Q$  and RMSD are much more reliable.

**Supplementary Table 1.** Coarse-grain model parameters for PDB ID 4G36

| <b>PDB ID</b> | <b>Protein name</b> | <b>Domain or interface</b> | <b>Structural class</b> | <b><math>\eta</math> used in model building</b> |
|---------------|---------------------|----------------------------|-------------------------|-------------------------------------------------|
| 4G36          | Firefly Luciferase  | Domain 1:1-12; 356-437     | $\beta$                 | 1.442                                           |
|               |                     | Domain 2:13-52; 212-355    | $\alpha/\beta$          | 1.114                                           |
|               |                     | Domain 3: 53-211           | $\alpha/\beta$          | 1.114                                           |
|               |                     | Domain 4: 438-550          | $\alpha/\beta$          | 1.916                                           |
|               |                     | Interface 1 2              | -                       | 1.235                                           |
|               |                     | Interface 1 3              | -                       | 1.235                                           |
|               |                     | Interface 1 4              | -                       | 1.507*                                          |
|               |                     | Interface 2 3              | -                       | 1.235                                           |
|               |                     | Interface 2 4              | -                       | 1.235                                           |
| Interface 3 4 | -                   | 1.235                      |                         |                                                 |

\*indicates interface is unstable at all tested values of  $\eta$  and so median interface value from set of stable interfaces is used for all simulations



**Supplementary Table 2** *E. coli* proteome dataset information

| Index | PDB ID | Chain ID | UniProt Entry name | Protein name                                      | Gene names                              |
|-------|--------|----------|--------------------|---------------------------------------------------|-----------------------------------------|
| 1     | 1A69   | A        | DEOD_ECOLI         | Purine nucleoside phosphorylase DeoD-type         | deoD, pup, b4384, JW4347                |
| 2     | 1A6J   | B        | PTSN_ECOLI         | Nitrogen regulatory protein                       | ptsN, rpoP, yhbI, b3204, JW3171         |
| 3     | 1A82   | A        | BIOD1_ECOLI        | ATP-dependent dethiobiotin synthetase BioD 1      | bioD1, b0778, JW0761                    |
| 4     | 1AG9   | A        | FLAV_ECOLI         | Flavodoxin 1                                      | fldA, b0684, JW0671                     |
| 5     | 1AH9   | Model 1  | IF1_ECOLI          | Translation initiation factor IF-1                | infA, b0884, JW0867                     |
| 6     | 1AKE   | A        | KAD_ECOLI          | Adenylate kinase                                  | Adk, dnaW, plsA, b0474, JW0463          |
| 7     | 1B9L   | A        | FOLX_ECOLI         | Dihydroneopterin triphosphate 2'-epimerase        | folX, b2303, JW2300                     |
| 8     | 1CLI   | A        | PUR5_ECOLI         | Phosphoribosylformylglycinamide cyclo-ligase      | purM, purG, b2499, JW2484               |
| 9     | 1D2F   | A        | MALY_ECOLI         | Protein MalY                                      | malY, b1622, JW1614                     |
| 10    | 1DCJ   | Model 1  | TUSA_ECOLI         | Sulfur carrier protein TusA                       | tusA, sirA, yhhP, b3470, JW3435         |
| 11    | 1DFU   | P        | RL25_ECOLI         | 50S ribosomal protein L25                         | rplY, b2185, JW2173                     |
| 12    | 1DUV   | G        | OTC1_ECOLI         | Ornithine carbamoyltransferase subunit I          | argI, b4254, JW4211                     |
| 13    | 1DXE   | A        | GARL_ECOLI         | 5-keto-4-deoxy-D-glucarate aldolase               | garL, yhaF, b3126, JW3095               |
| 14    | 1EF9   | A        | SCPB_ECOLI         | Methylmalonyl-CoA decarboxylase                   | scpB, mmcD, ygfG, b2919, JW2886         |
| 15    | 1EIX   | C        | PYRF_ECOLI         | Orotidine 5'-phosphate decarboxylase              | pyrF, b1281, JW1273                     |
| 16    | 1EM8   | A        | HOLC_ECOLI         | DNA polymerase III subunit chi                    | holC, b4259, JW4216                     |
| 17    | 1EUM   | A        | FTNA_ECOLI         | Bacterial non-heme ferritin                       | ftnA, ftn, gen-165, rsgA, b1905, JW1893 |
| 18    | 1FJJ   | A        | YBHB_ECOLI         | UPF0098 protein YbhB                              | ybhB, b0773, JW0756                     |
| 19    | 1FM0   | D        | MOAD_ECOLI         | Molybdopterin synthase sulfur carrier subunit     | moaD, chlA4, chlM, b0784, JW0767        |
| 20    | 1FTS   | A        | FTSY_ECOLI         | Signal recognition particle receptor FtsY         | ftsY, b3464, JW3429                     |
| 21    | 1FUI   | A        | FUCI_ECOLI         | L-fucose isomerase, Fuclase                       | fucl, b2802, JW2773                     |
| 22    | 1GER   | B        | GSHR_ECOLI         | Glutathione reductase                             | gor, b3500, JW3467                      |
| 23    | 1GLF   | O        | GLPK_ECOLI         | Glycerol kinase                                   | glpK, b3926, JW3897                     |
| 24    | 1GQE   | A        | RF2_ECOLI          | Peptide chain release factor RF2                  | prfB, supK, b2891, JW5847               |
| 25    | 1GQT   | B        | RBSK_ECOLI         | Ribokinase                                        | rbsK, b3752, JW3731                     |
| 26    | 1GT7   | A        | RHAD_ECOLI         | Rhamnulose-1-phosphate aldolase                   | rhaD, rhuA, b3902, JW3873               |
| 27    | 1GYT   | L        | AMPA_ECOLI         | Cytosol aminopeptidase                            | pepA, carP, xerB, b4260, JW4217         |
| 28    | 1GZ0   | C        | RLMB_ECOLI         | 23S rRNA (guanosine-2'-O-)-methyltransferase RlmB | rlmB, yjfH, b4180, JW4138               |
| 29    | 1H16   | A        | PFLB_ECOLI         | Formate acetyltransferase 1                       | pflB, pfl, b0903, JW0886                |
| 30    | 1H75   | A        | NRDH_ECOLI         | Glutaredoxin-like protein NrdH                    | nrdH, ygaN, b2673, JW2648               |

**Supplementary Table 2 cont.**

| Index | PDB ID | Chain ID | UniProt Entry name | Protein name                                        | Gene names                           |
|-------|--------|----------|--------------------|-----------------------------------------------------|--------------------------------------|
| 31    | 1I6O   | B        | CAN_ECOLI          | Carbonic anhydrase 2                                | can, cynT2, yadF, b0126, JW0122      |
| 32    | 1JNS   | Model 1  | PPIC_ECOLI         | Peptidyl-prolyl cis-trans isomerase C               | ppiC, parVA, b3775, JW3748           |
| 33    | 1JW2   | A        | HHA_ECOLI          | Hemolysin expression-modulating protein Hha         | hha, b0460, JW0449                   |
| 34    | 1JX7   | A        | YCHN_ECOLI         | Protein YchN                                        | ychN, b1219, JW1210                  |
| 35    | 1K7J   | A        | YCIO_ECOLI         | Uncharacterized protein YciO                        | yciO, b1267, JW5196                  |
| 36    | 1KO5   | A        | GNTK_ECOLI         | Thermoresistant gluconokinase                       | gntK, b3437, JW3400                  |
| 37    | 1KSF   | X        | CLPA_ECOLI         | ATP-dependent Clp protease ATP-binding subunit ClpA | clpA, lopD, b0882, JW0866            |
| 38    | 1L6W   | A        | FSAA_ECOLI         | Fructose-6-phosphate aldolase 1                     | fsaA, fsa, mipB, ybiZ, b0825, JW5109 |
| 39    | 1M3U   | A        | PANB_ECOLI         | 3-methyl-2-oxobutanoate hydroxymethyltransferase    | panB, b0134, JW0130                  |
| 40    | 1MZG   | B        | SUFE_ECOLI         | Cysteine desulfuration protein SufE                 | sufE, ynhA, b1679, JW1669            |
| 41    | 1NAQ   | A        | CUTA_ECOLI         | Divalent-cation tolerance protein CutA              | cutA, cutA1, cycY, b4137, JW4097     |
| 42    | 1NG9   | A        | MUTS_ECOLI         | DNA mismatch repair protein MutS                    | mutS, fdv, b2733, JW2703             |
| 43    | 1ORO   | A        | PYRE_ECOLI         | Orotate phosphoribosyltransferase                   | pyrE, b3642, JW3617                  |
| 44    | 1P7L   | A        | METK_ECOLI         | S-adenosylmethionine synthase                       | metK, metX, b2942, JW2909            |
| 45    | 1P91   | A        | RLMA_ECOLI         | 23S rRNA (guanine(745)-N(1))-methyltransferase      | rlmA, rrmA, yebH, b1822, JW1811      |
| 46    | 1PF5   | A        | YJGH_ECOLI         | RutC family protein YjgH                            | yjgH, b4248, JW4206                  |
| 47    | 1PMO   | B        | DCEB_ECOLI         | Glutamate decarboxylase beta                        | gadB, b1493, JW1488                  |
| 48    | 1PSU   | B        | PAAI_ECOLI         | Acyl-coenzyme A thioesterase Paal                   | paal, ydbV, b1396, JW1391            |
| 49    | 1Q5X   | A        | RRAA_ECOLI         | Regulator of ribonuclease activity A                | rraA, menG, yiiV, b3929, JW3900      |
| 50    | 1QF6   | A        | SYT_ECOLI          | Threonine-tRNA ligase                               | thrS, b1719, JW1709                  |
| 51    | 1QTW   | A        | END4_ECOLI         | Endonuclease 4                                      | Nfo, b2159, JW2146                   |
| 52    | 1RQJ   | A        | ISPA_ECOLI         | Farnesyl diphosphate synthase                       | ispA, b0421, JW0411                  |
| 53    | 1SG5   | Model 1  | ROF_ECOLI          | Protein rof                                         | Rof, yaeO, b0189, JW0184             |
| 54    | 1SV6   | A        | MHPD_ECOLI         | 2-keto-4-pentenoate hydratase                       | mhpD, b0350, JW0341                  |
| 55    | 1SVT   | J        | CH60_ECOLI         | 60 kDa chaperonin                                   | groL, groEL, mopA, b4143, JW4103     |
| 56    | 1T4B   | A        | DHAS_ECOLI         | Aspartate-semialdehyde dehydrogenase                | asd, hom, b3433, JW3396              |
| 57    | 1T8K   | A        | ACP_ECOLI          | Acyl carrier protein                                | acpP, b1094, JW1080                  |
| 58    | 1U0B   | B        | SYC_ECOLI          | Cysteine--tRNA ligase                               | cysS, b0526, JW0515                  |
| 59    | 1U60   | A        | GLSA1_ECOLI        | Glutaminase 1                                       | glsA1, ybaS, b0485, JW0474           |
| 60    | 1UUF   | A        | YAHK_ECOLI         | Aldehyde reductase YahK                             | yahK, b0325, JW0317                  |
| 61    | 1W78   | A        | FOLC_ECOLI         | Dihydrofolate synthase/folylpolyglutamate synthase  | folC, dedC, b2315, JW2312            |

**Supplementary Table 2 cont.**

| Index | PDB ID | Chain ID | UniProt Entry name | Protein name                                                      | Gene names                      |
|-------|--------|----------|--------------------|-------------------------------------------------------------------|---------------------------------|
| 62    | 1W8G   | A        | PLPHP_ECOLI        | Pyridoxal phosphate homeostasis protein                           | yggS, b2951, JW2918             |
| 63    | 1WOC   | C        | PRIB_ECOLI         | Primosomal replication protein N                                  | priB, b4201, JW4159             |
| 64    | 1XN7   | Model 1  | FEOC_ECOLI         | Probable [Fe-S]-dependent transcriptional repressor FeoC          | feoC, yhgG, b3410, JW3373       |
| 65    | 1XRU   | A        | KDUI_ECOLI         | 4-deoxy-L-threo-5-hexosulose-uronate ketol-isomerase              | kduI, yqeE, b2843, JW2811       |
| 66    | 1XVI   | A        | MPGP_ECOLI         | Mannosyl-3-phosphoglycerate phosphatase                           | yedP, b1955, JW1938             |
| 67    | 1YQQ   | A        | XAPA_ECOLI         | Purine nucleoside phosphorylase 2                                 | xapA, pndA, b2407, JW2398       |
| 68    | 1ZYL   | A        | SRKA_ECOLI         | Stress response kinase A                                          | srkA, rdoA, yihE, b3859, JW3831 |
| 69    | 1ZZM   | A        | YJVV_ECOLI         | Uncharacterized metal-dependent hydrolase YjvV                    | yjvV, b4378, JW4341             |
| 70    | 2A6Q   | E        | YOEB_ECOLI         | Toxin YoeB                                                        | yoeB, b4539, JW5331             |
| 71    | 2AXD   | Model 1  | HOLE_ECOLI         | DNA polymerase III subunit theta                                  | holE, b1842, JW1831             |
| 72    | 2D1P   | B        | TUSC_ECOLI         | Protein TusC                                                      | tusC, yheM, b3344, JW3306       |
| 73    | 2FEK   | Model 1  | WZB_ECOLI          | Low molecular weight protein-tyrosine-phosphatase Wzb             | wzb, b2061, JW2046              |
| 74    | 2FYM   | A        | ENO_ECOLI          | Enolase                                                           | eno, b2779, JW2750              |
| 75    | 2GQR   | A        | PUR7_ECOLI         | Phosphoribosylaminoimidazole-succinocarboxamide synthase          | purC, b2476, JW2461             |
| 76    | 2H1F   | A        | A0A0H2VC26_ECOLI6  | Lipopolysaccharide heptosyltransferase-1                          | rfaC, c4447                     |
| 77    | 2HD3   | K        | EUTN_ECOLI         | Ethanolamine catabolic microcompartment shell protein EutN        | eutN, cchB, yffY, b2456, JW2440 |
| 78    | 2HG2   | A        | ALDA_ECOLI         | Lactaldehyde dehydrogenase                                        | aldA, ald, b1415, JW1412        |
| 79    | 2HGK   | Model 1  | YQCC_ECOLI         | Uncharacterized protein YqcC                                      | yqcC, b2792, JW2763             |
| 80    | 2HNA   | A        | MIOC_ECOLI         | Protein MioC                                                      | mioC, yieB, b3742, JW3720       |
| 81    | 2HNH   | A        | DPO3A_ECOLI        | DNA polymerase III subunit alpha                                  | dnaE, polC, b0184, JW0179       |
| 82    | 2HO9   | Model 1  | CHEW_ECOLI         | Chemotaxis protein CheW                                           | cheW, b1887, JW1876             |
| 83    | 2ID0   | A        | RNB_ECOLI          | Exoribonuclease 2                                                 | rnb, b1286, JW1279              |
| 84    | 2JEE   | C        | ZAPB_ECOLI         | Cell division protein ZapB                                        | zapB, yjiU, b3928, JW3899       |
| 85    | 2JO6   | Model 1  | NIRD_ECOLI         | Nitrite reductase (NADH) small subunit                            | nirD, b3366, JW3329             |
| 86    | 2JRX   | Model 1  | YEJL_ECOLI         | UPF0352 protein YejL                                              | yejL, b2187, JW2175             |
| 87    | 2KC5   | Model 1  | HYBE_ECOLI         | Hydrogenase-2 operon protein HybE                                 | hybE, b2992, JW2960             |
| 88    | 2KFW   | Model 1  | SLYD_ECOLI         | FKBP-type peptidyl-prolyl cis-trans isomerase SlyD, PPIase        | slyD, b3349, JW3311             |
| 89    | 2KX9   | A        | PT1_ECOLI          | Phosphoenolpyruvate-protein phosphotransferase                    | ptsI, b2416, JW2409             |
| 90    | 2O1C   | A        | NUDB_ECOLI         | Dihydroneopterin triphosphate diphosphatase                       | nudB, ntpA, b1865, JW1854       |
| 91    | 2OQ3   | Model 1  | PTMA_ECOLI         | Mannitol-specific cryptic phosphotransferase enzyme IIA component | cmtB, b2934, JW2901             |
| 92    | 2PTH   | A        | PTH_ECOLI          | Peptidyl-tRNA hydrolase                                           | pth, b1204, JW1195              |
| 93    | 2PTQ   | A        | PUR8_ECOLI         | Adenylosuccinate lyase                                            | purB, b1131, JW1117             |
| 94    | 2QCU   | B        | GLPD_ECOLI         | Aerobic glycerol-3-phosphate dehydrogenase                        | glpD, glyD, b3426, JW3389       |
| 95    | 2QVR   | A        | F16PA_ECOLI        | Fructose-1,6-bisphosphatase class 1                               | fbp, fdp, b4232, JW4191         |

**Supplementary Table 2 cont.**

| Index | PDB ID | Chain ID | UniProt Entry name | Protein name                                                | Gene names                       |
|-------|--------|----------|--------------------|-------------------------------------------------------------|----------------------------------|
| 96    | 2R5N   | A        | TKT1_ECOLI         | Transketolase 1                                             | tktA, tkt, b2935, JW5478         |
| 97    | 2UYJ   | A        | TDCF_ECOLI         | Putative reactive intermediate deaminase TdcF               | tdcF, yhaR, b3113, JW5521        |
| 98    | 2V81   | A        | DGOA_ECOLI         | 2-dehydro-3-deoxy-6-phosphogalactonate aldolase             | dgoA, yidU, b4477, JW5628        |
| 99    | 2WIU   | A        | HIP_A_ECOLI        | Ser/Thr-protein kinase HipA                                 | hipA, b1507, JW1500              |
| 100   | 2WW4   | A        | ISPE_ECOLI         | 4-diphosphocytidyl-2-C-methyl-D-erythritol kinase, CMK      | ispE, ipk, ychB, b1208, JW1199   |
| 101   | 2YVA   | A        | DIAA_ECOLI         | DnaA initiator-associating protein DiaA                     | diaA, yraO, b3149, JW3118        |
| 102   | 3ASV   | B        | YDFG_ECOLI         | NADP-dependent 3-hydroxy acid dehydrogenase YdfG            | ydfG, b1539, JW1532              |
| 103   | 3BMB   | B        | RNK_ECOLI          | Regulator of nucleoside diphosphate kinase                  | rnk, b0610, JW0602               |
| 104   | 3BRQ   | B        | ASCG_ECOLI         | HTH-type transcriptional regulator AscG                     | ascG, b2714, JW5434              |
| 105   | 3GN5   | B        | MQSA_ECOLI         | Antitoxin MqsA                                              | mqsA, ygiT, b3021, JW2989        |
| 106   | 3HWO   | A        | ENTC_ECOLI         | Isochorismate synthase EntC                                 | entC, b0593, JW0585              |
| 107   | 3IV5   | B        | FIS_ECOLI          | DNA-binding protein Fis                                     | fis, b3261, JW3229               |
| 108   | 3M7M   | X        | HSLO_ECOLI         | 33 kDa chaperonin                                           | hslO, yrfI, b3401, JW5692        |
| 109   | 3N1S   | J        | HINT_ECOLI         | Purine nucleoside phosphoramidase                           | hinT, ycfF, b1103, JW1089        |
| 110   | 3NXC   | A        | SLMA_ECOLI         | Nucleoid occlusion factor SlmA                              | slmA, ttk, yicB, b3641, JW5641   |
| 111   | 3OFO   | D        | RS4_ECOLI          | 30S ribosomal protein S4                                    | rpsD, ramA, b3296, JW3258        |
| 112   | 3PCO   | D        | SYFB_ECOLI         | Phenylalanine--tRNA ligase beta subunit                     | pheT, b1713, JW1703              |
| 113   | 3QOU   | A        | CNOX_ECOLI         | Chaperedoxin                                                | cnoX, ybbN, b0492, JW5067        |
| 114   | 4A2C   | A        | GATD_ECOLI         | Galactitol 1-phosphate 5-dehydrogenase                      | gatD, b2091, JW2075              |
| 115   | 4DCM   | A        | RLMG_ECOLI         | Ribosomal RNA large subunit methyltransferase G             | rlmG, ygjO, b3084, JW5513        |
| 116   | 4DZD   | A        | CAS6_ECOLI         | CRISPR system Cascade subunit CasE                          | casE, cas6e, ygcH, b2756, JW2726 |
| 117   | 4E8B   | A        | RSME_ECOLI         | Ribosomal RNA small subunit methyltransferase E             | rsmE, yggJ, b2946, JW2913        |
| 118   | 4FZW   | A        | PAAF_ECOLI         | 2,3-dehydroadipyl-CoA hydratase                             | paaF, ydbR, b1393, JW1388        |
| 119   | 4HR7   | A        | ACCC_ECOLI         | Biotin carboxylase                                          | accC, fabG, b3256, JW3224        |
| 120   | 4IM7   | A        | A0A0H2V7F2_ECOLI6  | Hypothetical oxidoreductase ydfI                            | c1968                            |
| 121   | 4IWX   | A        | RIMK_ECOLI         | Ribosomal protein S6--L-glutamate ligase                    | rimK, b0852, JW0836              |
| 122   | 4KN7   | A        | RPOB_ECOLI         | DNA-directed RNA polymerase subunit beta, RNAP subunit beta | rpoB, groN, nitB, rif, ron, stl  |

**Supplementary Table 3.** Proteins categorized by percent of trajectories misfolded

| Category               | Number of proteins | PDB IDs                                                                                                                                                                                                                                                                                                                                                                                                                                                                                        |
|------------------------|--------------------|------------------------------------------------------------------------------------------------------------------------------------------------------------------------------------------------------------------------------------------------------------------------------------------------------------------------------------------------------------------------------------------------------------------------------------------------------------------------------------------------|
| At least 2% misfolded  | 80                 | 1A69, 1A6J, 1A82, 1AH9, 1DFU, 1DXE, 1FJJ, 1GQT, 1GT7, 1H16, 1I6O, 1K7J, 1L6W, 1M3U, 1NAQ, 1ORO, 1P91, 1PF5, 1PMO, 1Q5X, 1SV6, 1U60, 1W8G, 1WOC, 1YQQ, 1ZYL, 2HNA, 2JO6, 2O1C, 2PTH, 2V81, 2YVA, 3BMB, 3HWO, 4A2C, 1CLI, 1D2F, 1DUV, 1EF9, 1FTS, 1FUI, 1GER, 1GLF, 1GYT, 1GZ0, 1KSF, 1NG9, 1P7L, 1QF6, 1SVT, 1T4B, 1U0B, 1UUF, 1W78, 1XRU, 1XVI, 2FYM, 2H1F, 2HG2, 2HNN, 2ID0, 2KFW, 2KX9, 2PTQ, 2QCU, 2R5N, 2WIU, 2WW4, 3BRQ, 3GN5, 3M7M, 3PCO, 4DCM, 4DZD, 4E8B, 4FZW, 4HR7, 4IM7, 4IWX, 4KN7 |
| At least 20% misfolded | 49                 | 1A69, 1DFU, 1DXE, 1GQT, 1H16, 1K7J, 1P91, 1SV6, 1U60, 1YQQ, 1ZYL, 2HNA, 2JO6, 2V81, 3HWO, 4A2C, 1CLI, 1DUV, 1FTS, 1FUI, 1GLF, 1GYT, 1GZ0, 1KSF, 1NG9, 1P7L, 1QF6, 1SVT, 1T4B, 1U0B, 1W78, 1XRU, 1XVI, 2FYM, 2HG2, 2HNN, 2ID0, 2KFW, 2KX9, 2QCU, 2R5N, 2WIU, 3GN5, 3PCO, 4E8B, 4HR7, 4IM7, 4IWX, 4KN7                                                                                                                                                                                           |
| At least 50% misfolded | 27                 | 1GQT, 1H16, 1K7J, 1P91, 1U60, 1YQQ, 2JO6, 2V81, 1CLI, 1FUI, 1GYT, 1GZ0, 1KSF, 1P7L, 1T4B, 1U0B, 1XVI, 2HNN, 2ID0, 2KX9, 2QCU, 2R5N, 3PCO, 4E8B, 4HR7, 4IM7, 4KN7                                                                                                                                                                                                                                                                                                                               |
| 100% misfolded         | 9                  | 1GQT, 1H16, 1FUI, 1GYT, 1GZ0, 1XVI, 4E8B, 4HR7, 4KN7                                                                                                                                                                                                                                                                                                                                                                                                                                           |

**Supplementary Table 4.** Extrapolated folding times for the 73 proteins with a reliable estimate

| PDB ID | Simulated $\tau_F$ , ns | Estimated experimental $\tau_F$ , s | Estimated experimental $\tau_F$ , min | Estimated experimental $\tau_F$ , h | Estimated experimental $\tau_F$ , d |
|--------|-------------------------|-------------------------------------|---------------------------------------|-------------------------------------|-------------------------------------|
| 1SG5   | 1.08E+01                | 4.29E-02                            | 7.15E-04                              | 1.19E-05                            | 4.97E-07                            |
| 2AXD   | 1.08E+01                | 4.29E-02                            | 7.15E-04                              | 1.19E-05                            | 4.97E-07                            |
| 3IV5   | 1.15E+01                | 4.55E-02                            | 7.58E-04                              | 1.26E-05                            | 5.27E-07                            |
| 2JRX   | 1.57E+01                | 6.22E-02                            | 1.04E-03                              | 1.73E-05                            | 7.20E-07                            |
| 2KC5   | 1.68E+01                | 6.67E-02                            | 1.11E-03                              | 1.85E-05                            | 7.72E-07                            |
| 2HO9   | 2.10E+01                | 8.34E-02                            | 1.39E-03                              | 2.32E-05                            | 9.65E-07                            |
| 2JEE   | 2.28E+01                | 9.05E-02                            | 1.51E-03                              | 2.52E-05                            | 1.05E-06                            |
| 3QOU   | 3.77E+01                | 1.50E-01                            | 2.49E-03                              | 4.16E-05                            | 1.73E-06                            |
| 1H75   | 4.25E+01                | 1.69E-01                            | 2.81E-03                              | 4.68E-05                            | 1.95E-06                            |
| 1T8K   | 4.30E+01                | 1.70E-01                            | 2.84E-03                              | 4.73E-05                            | 1.97E-06                            |
| 2FEK   | 4.30E+01                | 1.70E-01                            | 2.84E-03                              | 4.74E-05                            | 1.97E-06                            |
| 1MZG   | 5.86E+01                | 2.32E-01                            | 3.87E-03                              | 6.45E-05                            | 2.69E-06                            |
| 3NXC   | 9.97E+01                | 3.96E-01                            | 6.60E-03                              | 1.10E-04                            | 4.58E-06                            |
| 1FM0   | 1.07E+02                | 4.26E-01                            | 7.10E-03                              | 1.18E-04                            | 4.93E-06                            |
| 2HGK   | 2.84E+02                | 1.13E+00                            | 1.88E-02                              | 3.13E-04                            | 1.30E-05                            |
| 4DCM   | 2.92E+02                | 1.16E+00                            | 1.93E-02                              | 3.21E-04                            | 1.34E-05                            |
| 1GQE   | 3.42E+02                | 1.36E+00                            | 2.26E-02                              | 3.76E-04                            | 1.57E-05                            |
| 1ZZM   | 3.51E+02                | 1.39E+00                            | 2.32E-02                              | 3.87E-04                            | 1.61E-05                            |
| 2KX9   | 3.55E+02                | 1.41E+00                            | 2.35E-02                              | 3.92E-04                            | 1.63E-05                            |
| 2OQ3   | 3.63E+02                | 1.44E+00                            | 2.40E-02                              | 4.00E-04                            | 1.67E-05                            |
| 1EIX   | 4.34E+02                | 1.72E+00                            | 2.87E-02                              | 4.78E-04                            | 1.99E-05                            |
| 1KO5   | 4.39E+02                | 1.74E+00                            | 2.90E-02                              | 4.84E-04                            | 2.02E-05                            |
| 1GT7   | 5.36E+02                | 2.13E+00                            | 3.54E-02                              | 5.91E-04                            | 2.46E-05                            |
| 3N1S   | 5.83E+02                | 2.31E+00                            | 3.85E-02                              | 6.42E-04                            | 2.68E-05                            |
| 2QVR   | 6.26E+02                | 2.48E+00                            | 4.14E-02                              | 6.90E-04                            | 2.87E-05                            |
| 1AG9   | 8.60E+02                | 3.41E+00                            | 5.68E-02                              | 9.47E-04                            | 3.95E-05                            |
| 1EUM   | 9.16E+02                | 3.64E+00                            | 6.06E-02                              | 1.01E-03                            | 4.21E-05                            |
| 3OFO   | 9.94E+02                | 3.94E+00                            | 6.57E-02                              | 1.10E-03                            | 4.56E-05                            |
| 2KFW   | 1.81E+03                | 7.20E+00                            | 1.20E-01                              | 2.00E-03                            | 8.33E-05                            |
| 3BMB   | 3.36E+03                | 1.33E+01                            | 2.22E-01                              | 3.70E-03                            | 1.54E-04                            |
| 2PTH   | 3.39E+03                | 1.35E+01                            | 2.24E-01                              | 3.74E-03                            | 1.56E-04                            |
| 2GQR   | 3.82E+03                | 1.51E+01                            | 2.52E-01                              | 4.21E-03                            | 1.75E-04                            |
| 1QTW   | 4.13E+03                | 1.64E+01                            | 2.73E-01                              | 4.55E-03                            | 1.90E-04                            |
| 1JX7   | 4.43E+03                | 1.76E+01                            | 2.93E-01                              | 4.88E-03                            | 2.03E-04                            |
| 2YVA   | 5.42E+03                | 2.15E+01                            | 3.59E-01                              | 5.98E-03                            | 2.49E-04                            |
| 1PSU   | 1.05E+04                | 4.16E+01                            | 6.93E-01                              | 1.15E-02                            | 4.81E-04                            |
| 1GLF   | 1.28E+04                | 5.09E+01                            | 8.49E-01                              | 1.41E-02                            | 5.89E-04                            |
| 1A6J   | 1.54E+04                | 6.12E+01                            | 1.02E+00                              | 1.70E-02                            | 7.09E-04                            |
| 1DXE   | 1.81E+04                | 7.18E+01                            | 1.20E+00                              | 2.00E-02                            | 8.31E-04                            |
| 2HD3   | 1.93E+04                | 7.65E+01                            | 1.28E+00                              | 2.13E-02                            | 8.86E-04                            |
| 4IM7   | 2.46E+04                | 9.77E+01                            | 1.63E+00                              | 2.71E-02                            | 1.13E-03                            |
| 1XRU   | 3.38E+04                | 1.34E+02                            | 2.23E+00                              | 3.72E-02                            | 1.55E-03                            |

**Supplementary Table 4 cont.**

| <b>PDB ID</b> | <b>Simulated <math>\tau_F</math>, ns</b> | <b>Estimated experimental <math>\tau_F</math>, s</b> | <b>Estimated experimental <math>\tau_F</math>, min</b> | <b>Estimated experimental <math>\tau_F</math>, h</b> | <b>Estimated experimental <math>\tau_F</math>, d</b> |
|---------------|------------------------------------------|------------------------------------------------------|--------------------------------------------------------|------------------------------------------------------|------------------------------------------------------|
| 1I6O          | 4.03E+04                                 | 1.60E+02                                             | 2.66E+00                                               | 4.44E-02                                             | 1.85E-03                                             |
| 1EF9          | 4.66E+04                                 | 1.85E+02                                             | 3.08E+00                                               | 5.13E-02                                             | 2.14E-03                                             |
| 1ORO          | 4.82E+04                                 | 1.91E+02                                             | 3.18E+00                                               | 5.31E-02                                             | 2.21E-03                                             |
| 1SV6          | 4.94E+04                                 | 1.96E+02                                             | 3.26E+00                                               | 5.44E-02                                             | 2.27E-03                                             |
| 1AH9          | 6.57E+04                                 | 2.61E+02                                             | 4.34E+00                                               | 7.24E-02                                             | 3.02E-03                                             |
| 3GN5          | 7.30E+04                                 | 2.90E+02                                             | 4.83E+00                                               | 8.04E-02                                             | 3.35E-03                                             |
| 1ZYL          | 8.02E+04                                 | 3.18E+02                                             | 5.30E+00                                               | 8.84E-02                                             | 3.68E-03                                             |
| 2PTQ          | 5.28E+05                                 | 2.09E+03                                             | 3.49E+01                                               | 5.82E-01                                             | 2.42E-02                                             |
| 2V81          | 5.58E+05                                 | 2.22E+03                                             | 3.69E+01                                               | 6.15E-01                                             | 2.56E-02                                             |
| 1FTS          | 4.60E+06                                 | 1.83E+04                                             | 3.04E+02                                               | 5.07E+00                                             | 2.11E-01                                             |
| 3M7M          | 7.33E+13                                 | 2.91E+11                                             | 4.85E+09                                               | 8.08E+07                                             | 3.36E+06                                             |
| 4IWX          | 7.61E+13                                 | 3.02E+11                                             | 5.03E+09                                               | 8.39E+07                                             | 3.50E+06                                             |
| 1KSF          | 2.59E+14                                 | 1.03E+12                                             | 1.71E+10                                               | 2.85E+08                                             | 1.19E+07                                             |
| 3BRQ          | 3.83E+18                                 | 1.52E+16                                             | 2.53E+14                                               | 4.22E+12                                             | 1.76E+11                                             |
| 2FYM          | 1.28E+19                                 | 5.06E+16                                             | 8.44E+14                                               | 1.41E+13                                             | 5.86E+11                                             |
| 1CLI          | 2.35E+19                                 | 9.31E+16                                             | 1.55E+15                                               | 2.59E+13                                             | 1.08E+12                                             |
| 2O1C          | 3.30E+19                                 | 1.31E+17                                             | 2.18E+15                                               | 3.64E+13                                             | 1.52E+12                                             |
| 1NG9          | 1.35E+20                                 | 5.37E+17                                             | 8.94E+15                                               | 1.49E+14                                             | 6.21E+12                                             |
| 1U60          | 1.65E+20                                 | 6.53E+17                                             | 1.09E+16                                               | 1.81E+14                                             | 7.56E+12                                             |
| 1K7J          | 6.72E+20                                 | 2.67E+18                                             | 4.45E+16                                               | 7.41E+14                                             | 3.09E+13                                             |
| 1W78          | 7.66E+20                                 | 3.04E+18                                             | 5.07E+16                                               | 8.45E+14                                             | 3.52E+13                                             |
| 2HNH          | 7.85E+20                                 | 3.11E+18                                             | 5.19E+16                                               | 8.65E+14                                             | 3.60E+13                                             |
| 1U0B          | 2.82E+21                                 | 1.12E+19                                             | 1.87E+17                                               | 3.11E+15                                             | 1.30E+14                                             |
| 1UUF          | 7.80E+21                                 | 3.09E+19                                             | 5.15E+17                                               | 8.59E+15                                             | 3.58E+14                                             |
| 2ID0          | 4.21E+22                                 | 1.67E+20                                             | 2.78E+18                                               | 4.64E+16                                             | 1.93E+15                                             |
| 1QF6          | 7.43E+22                                 | 2.95E+20                                             | 4.91E+18                                               | 8.19E+16                                             | 3.41E+15                                             |
| 2HG2          | 2.83E+23                                 | 1.12E+21                                             | 1.87E+19                                               | 3.12E+17                                             | 1.30E+16                                             |
| 2QCU          | 1.66E+24                                 | 6.60E+21                                             | 1.10E+20                                               | 1.83E+18                                             | 7.64E+16                                             |
| 2WIU          | 4.80E+27                                 | 1.91E+25                                             | 3.18E+23                                               | 5.29E+21                                             | 2.20E+20                                             |
| 1GER          | 3.73E+28                                 | 1.48E+26                                             | 2.47E+24                                               | 4.11E+22                                             | 1.71E+21                                             |
| 1YQQ          | 2.34E+29                                 | 9.30E+26                                             | 1.55E+25                                               | 2.58E+23                                             | 1.08E+22                                             |

**Supplementary Table 5.** Proteins with at least one misfolded trajectory expected to bypass chaperones

| Category                                               | Number of unique proteins | PDB IDs                                                                                                                                                                                                                                                                                                                                                                                                                                                                                         |
|--------------------------------------------------------|---------------------------|-------------------------------------------------------------------------------------------------------------------------------------------------------------------------------------------------------------------------------------------------------------------------------------------------------------------------------------------------------------------------------------------------------------------------------------------------------------------------------------------------|
| Not expected to interact with TF                       | 70                        | 2ID0, 4IWX, 1A69, 2WIU, 1U60, 4DZD, 2HNNH, 3HWO, 1KSF, 1ORO, 1ZYL, 3BRQ, 1XRU, 1EF9, 2PTQ, 2FYM, 1NG9, 1DXE, 2JO6, 4A2C, 1PMO, 2KX9, 2R5N, 1K7J, 1GT7, 2WW4, 3M7M, 3PCO, 1GLF, 1GER, 2H1F, 1YQQ, 1DFU, 1SVT, 2V81, 1NAQ, 1U0B, 1PF5, 1FJJ, 2YVA, 1DUV, 1UUF, 3BMB, 1A6J, 1SV6, 1W78, 4IM7, 2KFW, 1Q5X, 1P7L, 1QF6, 1T4B, 4FZW, 1AH9, 1FTS, 2QCU, 1CLI, 2PTH, 2O1C, 2HNA, 1W8G, 3GN5, 1WOC, 4DCM, 1A82, 2HG2, 1L6W, 1D2F, 1I6O, 1M3U                                                             |
| Not expected to interact with GroEL/GroES              | 80                        | 2ID0, 1XVI, 4IWX, 1A69, 1FUI, 2WIU, 1U60, 4DZD, 2HNNH, 3HWO, 1KSF, 1ORO, 1P91, 1ZYL, 3BRQ, 1XRU, 1EF9, 2PTQ, 2FYM, 1NG9, 1DXE, 4HR7, 2JO6, 2HG2, 4A2C, 1PMO, 2KX9, 2R5N, 1K7J, 1GT7, 1GQT, 2WW4, 3M7M, 3PCO, 1GLF, 1GER, 2H1F, 1YQQ, 1DFU, 1SVT, 2V81, 1NAQ, 1U0B, 1PF5, 1FJJ, 2YVA, 1DUV, 1UUF, 3BMB, 1A6J, 1H16, 1SV6, 1W78, 4IM7, 2KFW, 1Q5X, 1P7L, 1QF6, 2PTH, 3GN5, 4FZW, 1AH9, 1FTS, 2QCU, 1GZ0, 1CLI, 2O1C, 2HNA, 4E8B, 1W8G, 1WOC, 4DCM, 1A82, 1L6W, 1T4B, 1D2F, 1I6O, 4KN7, 1GYT, 1M3U |
| Not expected to interact with DnaK                     | 77                        | 2ID0, 1XVI, 4IWX, 1A69, 1FUI, 2WIU, 1U60, 4DZD, 2HNNH, 3HWO, 1KSF, 1ORO, 1P91, 1ZYL, 3BRQ, 1XRU, 2PTQ, 2FYM, 4HR7, 1NG9, 1DXE, 2JO6, 2HG2, 4A2C, 1PMO, 2KX9, 2R5N, 1K7J, 1GT7, 2WW4, 3M7M, 3PCO, 1GLF, 1GER, 2H1F, 1YQQ, 1DFU, 1SVT, 2V81, 1NAQ, 1U0B, 1PF5, 1FJJ, 2YVA, 1DUV, 1UUF, 3BMB, 1A6J, 1H16, 1SV6, 1W78, 4IM7, 2KFW, 1Q5X, 1P7L, 1QF6, 2PTH, 3GN5, 4FZW, 1AH9, 1FTS, 2QCU, 1GZ0, 2O1C, 2HNA, 1GYT, 4E8B, 1W8G, 1WOC, 4DCM, 1A82, 1L6W, 1T4B, 1D2F, 4KN7, 1CLI, 1M3U                   |
| Not expected to interact with TF, GroEL/GroES, or DnaK | 68                        | 2ID0, 4IWX, 1A69, 2WIU, 1U60, 4DZD, 2HNNH, 3HWO, 1KSF, 1ORO, 1ZYL, 3BRQ, 1XRU, 2PTQ, 2FYM, 1NG9, 1DXE, 2JO6, 4A2C, 1PMO, 2KX9, 2R5N, 1K7J, 1GT7, 2WW4, 3M7M, 3PCO, 1GLF, 1GER, 2H1F, 1YQQ, 1DFU, 1SVT, 2V81, 1NAQ, 1U0B, 1PF5, 1FJJ, 2YVA, 1DUV, 1UUF, 3BMB, 1A6J, 1SV6, 1W78, 4IM7, 2KFW, 1Q5X, 1P7L, 1QF6, 4FZW, 1AH9, 1FTS, 2QCU, 2PTH, 2O1C, 2HNA, 1W8G, 3GN5, 1WOC, 4DCM, 1A82, 2HG2, 1L6W, 1T4B, 1D2F, 1CLI, 1M3U                                                                         |



**Supplementary Table 6.** Proteins with at least one misfolded trajectory expected not to aggregate or be degraded

| Category                    | Number of unique proteins | PDB IDs                                                                                                                                                                                                                                                                                                                                                                                                                             |
|-----------------------------|---------------------------|-------------------------------------------------------------------------------------------------------------------------------------------------------------------------------------------------------------------------------------------------------------------------------------------------------------------------------------------------------------------------------------------------------------------------------------|
| Not expected to aggregate   | 68                        | 2ID0, 1XVI, 1A69, 1FUI, 2WIU, 1U60, 4DZD, 2HNNH, 3HWO, 1KSF, 1ORO, 1P91, 1ZYL, 3BRQ, 1XRU, 2PTQ, 2FYM, 4HR7, 1NG9, 2JO6, 2HG2, 4A2C, 1PMO, 2KX9, 2R5N, 1K7J, 1GT7, 2WW4, 3M7M, 3PCO, 1DFU, 1SVT, 1U0B, 1PF5, 1FJJ, 1DUV, 1SV6, 1W78, 4IM7, 1YQQ, 2KFW, 1Q5X, 1P7L, 1QF6, 2PTH, 3GN5, 4FZW, 1AH9, 1FTS, 2QCU, 1GZ0, 1CLI, 2O1C, 2HNA, 1A6J, 1W8G, 1WOC, 4DCM, 1A82, 1L6W, 1T4B, 1D2F, 1NAQ, 1I6O, 1GER, 4KN7, 1GYT, 1M3U             |
| Not expected to be degraded | 70                        | 2ID0, 1XVI, 1A69, 1FUI, 2WIU, 1U60, 4DZD, 2HNNH, 3HWO, 1KSF, 1ORO, 1P91, 1ZYL, 3BRQ, 1XRU, 2PTQ, 2FYM, 1NG9, 4HR7, 2JO6, 2HG2, 4A2C, 1PMO, 2KX9, 2R5N, 1K7J, 1GT7, 2WW4, 3M7M, 3PCO, 1GER, 1YQQ, 1DFU, 1SVT, 1U0B, 1PF5, 1FJJ, 1DUV, 1SV6, 1W78, 4IM7, 2KFW, 1Q5X, 1NAQ, 1P7L, 1QF6, 2PTH, 3GN5, 4FZW, 1AH9, 1FTS, 2QCU, 1GZ0, 1CLI, 2O1C, 1A6J, 4E8B, 1W8G, 1WOC, 4DCM, 1A82, 2HNA, 1L6W, 1T4B, 1UUF, 1D2F, 1I6O, 4KN7, 1GYT, 1M3U |

**Supplementary Table 7.** Proteins with misfolded conformations expected to bypass proteostasis machinery and remain soluble but less functional

| Category                                                                  | Number of unique proteins | PDB IDs                                                                                                                                                                                                                                                                                                                                                                                                                       |
|---------------------------------------------------------------------------|---------------------------|-------------------------------------------------------------------------------------------------------------------------------------------------------------------------------------------------------------------------------------------------------------------------------------------------------------------------------------------------------------------------------------------------------------------------------|
| Expected to bypass chaperones, not aggregate, and not be degraded         | 58                        | 2ID0, 1A69, 2WIU, 1U60, 4DZD, 2HNNH, 3HWO, 1KSF, 1ORO, 1ZYL, 3BRQ, 1XRU, 2PTQ, 2FYM, 1NG9, 2JO6, 4A2C, 1PMO, 2KX9, 2R5N, 1K7J, 1GT7, 2WW4, 3M7M, 3PCO, 1DFU, 1SVT, 1U0B, 1PF5, 1FJJ, 1DUV, 1SV6, 1W78, 4IM7, 1YQQ, 2KFW, 1Q5X, 1P7L, 1QF6, 4FZW, 1AH9, 1FTS, 2QCU, 2PTH, 2O1C, 1A6J, 1W8G, 3GN5, 1WOC, 4DCM, 1A82, 2HNA, 1L6W, 1T4B, 1D2F, 1GER, 1CLI, 1M3U                                                                   |
| Expected to exhibit reduced function                                      | 69                        | 1XVI, 4IWX, 1A69, 1FUI, 2WIU, 1U60, 4DZD, 2HNNH, 3HWO, 2ID0, 1ZYL, 1XRU, 1P91, 1EF9, 2FYM, 4HR7, 1NG9, 1DXE, 2HG2, 1PMO, 2R5N, 1K7J, 1GQT, 3PCO, 1GLF, 2H1F, 1YQQ, 1DFU, 1SVT, 2V81, 1NAQ, 1U0B, 2YVA, 4KN7, 1DUV, 1UUF, 3BMB, 1A6J, 1H16, 1SV6, 1W78, 4IM7, 1Q5X, 2PTH, 1T4B, 4FZW, 1FTS, 2QCU, 1P7L, 1GZ0, 1KSF, 1CLI, 1GYT, 1WOC, 2PTQ, 1A82, 2WW4, 4A2C, 3GN5, 1L6W, 1GT7, 1QF6, 1D2F, 1I6O, 1GER, 2KX9, 2O1C, 1PF5, 3M7M |
| Expected to bypass proteostasis machinery and to exhibit reduced function | 41                        | 1A69, 2WIU, 1U60, 4DZD, 3HWO, 1ZYL, 1XRU, 2FYM, 1NG9, 1PMO, 2R5N, 1K7J, 1DFU, 1SVT, 1U0B, 1SV6, 1W78, 4IM7, 1YQQ, 1Q5X, 4FZW, 1FTS, 2QCU, 1KSF, 2PTH, 2HNNH, 1WOC, 2PTQ, 1A82, 2ID0, 3GN5, 3PCO, 1L6W, 1T4B, 1A6J, 1GT7, 1D2F, 1GER, 1DUV, 2O1C, 1PF5                                                                                                                                                                         |

**Supplementary Table 8.** Values of  $\langle \zeta_{\text{peptide}} \rangle$  and locations of principle entanglements by metastable state

| Markov State | $\langle \zeta_{\text{peptide}} \rangle$ , % |                               |                            | Principle entanglement* |                   |                                         |
|--------------|----------------------------------------------|-------------------------------|----------------------------|-------------------------|-------------------|-----------------------------------------|
|              | [333-354]                                    | [F351]                        | [L293]                     | Loop segment            | Threading segment | Overlapping with non-refoldable region? |
| S1           | 1.56<br>[0.83, 2.30]                         | 108.38<br>[84.49, 133.75]     | 50.45<br>[-12.64, 123.61]  | <b>44-314</b>           | <b>318-337</b>    | Yes                                     |
| S2           | 86.53<br>[84.74, 88.30]                      | 6446.30<br>[6266.09, 6626.00] | 28.83<br>[-27.88, 99.59]   | 271-288                 | 218-237           | No                                      |
| S3           | 1.42<br>[1.11, 1.74]                         | 51.22<br>[42.10, 60.67]       | -12.30<br>[-42.09, 22.20]  | -                       | -                 | -                                       |
| S4           | 14.66<br>[13.73, 15.60]                      | 1802.97<br>[1707.65, 1900.01] | 358.21<br>[151.55, 608.55] | 90-138                  | <b>318-337</b>    | Yes                                     |
| S5           | 22.42<br>[21.41, 23.43]                      | 1644.79<br>[1567.43, 1723.38] | 58.64<br>[-8.93, 154.10]   | 271-288                 | 218-237           | No                                      |
| S6           | 1.03<br>[0.38, 1.69]                         | 358.65<br>[312.01, 407.32]    | 87.72<br>[-2.56, 212.08]   | 41-207                  | <b>318-337</b>    | Yes                                     |
| S7           | 6.55<br>[6.41, 6.69]                         | 506.27<br>[496.06, 516.54]    | 155.52<br>[125.11, 188.00] | <b>44-313</b>           | <b>317-336</b>    | Yes                                     |
| S8           | 3.85<br>[3.61, 4.10]                         | 302.66<br>[290.37, 315.22]    | 66.70<br>[25.23, 115.01]   | <b>44-313</b>           | <b>317-336</b>    | Yes                                     |

\*principle entanglement refers to the entanglement present in a representative structure for each metastable state. Segments that overlap with [333-354], [F351], or [L293] are highlighted in bold.

**Supplementary Table 9.** Definitions of entanglement types

| Type | Change in entanglement | Change in chirality | Conditional*                                                                                                                  |
|------|------------------------|---------------------|-------------------------------------------------------------------------------------------------------------------------------|
| G0   | Gain                   | No                  | $ g^{\text{current}}(i, j)  >  g^{\text{native}}(i, j) $ and $g^{\text{current}}(i, j) \times g^{\text{native}}(i, j) \geq 0$ |
| G1   | Gain                   | Yes                 | $ g^{\text{current}}(i, j)  >  g^{\text{native}}(i, j) $ and $g^{\text{current}}(i, j) \times g^{\text{native}}(i, j) < 0$    |
| G2   | Lose                   | No                  | $ g^{\text{current}}(i, j)  <  g^{\text{native}}(i, j) $ and $g^{\text{current}}(i, j) \times g^{\text{native}}(i, j) \geq 0$ |
| G3   | Lose                   | Yes                 | $ g^{\text{current}}(i, j)  <  g^{\text{native}}(i, j) $ and $g^{\text{current}}(i, j) \times g^{\text{native}}(i, j) < 0$    |
| G4   | None                   | Yes                 | $ g^{\text{current}}(i, j)  =  g^{\text{native}}(i, j) $ and $g^{\text{current}}(i, j) \times g^{\text{native}}(i, j) < 0$    |
| G5   | None                   | None                | $ g^{\text{current}}(i, j)  =  g^{\text{native}}(i, j) $ and $g^{\text{current}}(i, j) \times g^{\text{native}}(i, j) \geq 0$ |

\* conditional used to determine if a native contact between residues  $i$  and  $j$  has a change in a given type of entanglement in the current structure relative to the native state structure.

**Supplementary Table 10.** Functional residues database terms and descriptions

| <b>Term in database</b> | <b>Description</b>                                                       |
|-------------------------|--------------------------------------------------------------------------|
| PDB used in model       | Uniprot: PDB ID used in the simulation                                   |
| Gene name               | Uniprot: Name of gene                                                    |
| Protein Uniprot ID      | Uniprot: ID associated with gene in uniprot                              |
| Ordered Locus           | Uniprot: Ordered locus associated with gene                              |
| Function                | Uniprot: Function of the gene product                                    |
| Catalytic activity      | Uniprot: Catalytic activity of protein                                   |
| Subunit                 | Uniprot: Information about n-mers structure                              |
| GO functions            | Uniprot: Gene ontology functions                                         |
| Binding site            | Uniprot: Information about mapped and unmapped binding site              |
| Active site             | Uniprot: Information about mapped and unmapped active site               |
| Metal binding site      | Uniprot: Information about mapped and unmapped metal binding site        |
| Site                    | Uniprot: Information about mapped and unmapped site                      |
| Absorption              | Uniprot: Information about ligands absorbed                              |
| Calcium binding         | Uniprot: Information about calcium binding                               |
| DNA binding             | Uniprot: Information about DNA binding                                   |
| EC number               | Uniprot: Enzyme Commission number                                        |
| Metal binding           | Uniprot: Information about mapped and unmapped metal binding             |
| Nucleotide binding      | Uniprot: Information about mapped and unmapped about nucleotide binding  |
| Pathway                 | Uniprot: Information about mechanism pathway                             |
| pH dependence           | Uniprot: Information about the protein function's pH dependence          |
| Temperature dependence  | Uniprot: Information about the protein function's temperature dependence |
| Cofactor                | Uniprot: Information about the protein's cofactors                       |

**Supplementary Table 10** continued

| <b>Term in database</b>                  | <b>Description</b>                                                                                                            |
|------------------------------------------|-------------------------------------------------------------------------------------------------------------------------------|
| Kinetics                                 | Uniprot: Information about the kinetics of the protein                                                                        |
| mRNA sequence                            | mRNA sequence of the gene product                                                                                             |
| AA sequence                              | Amino acid sequence of the gene product                                                                                       |
| CIF sequence of # - X                    | PDB: Amino acid sequence of the chain X in CIF #                                                                              |
| Unmapped active residues from CIF #      | PDB: Chain ID, Residue # in CIF file, Residue Name, Ligand in contact with                                                    |
| Mapped active residues from CIF #        | PDB: Chain ID, Mapped residue #, Residue Name, Ligand in contact with                                                         |
| Ligand abbreviation from CIF #           | PDB: 3 letter abbreviation, ligand name                                                                                       |
| Unmapped interfacial residues from CIF # | PDB: Chain 1, residue name, unmapped residue # in CIF file, Chain 2, residue name, unmapped residue # in CIF file             |
| Mapped interfacial residues from CIF #   | PDB: Chain 1, residue name, mapped residue, Chain 2, residue name, unmapped residue # in CIF file                             |
| Small molecule active residues (mapped)  | PDB: List of residues in contact with small molecules and ligands                                                             |
| Interfacial active residues (mapped)     | PDB: List of interfacial residues in the crystal structure                                                                    |
| Combined active residues (mapped)        | Uniprot and PDB: List of functional residues from Uniprot, residues interacting with small molecules and interfacial residues |

**Supplementary Table 11.** Percent of native state simulation frames with metric  $\geq 10\%$  averaged over set of 122 *E. coli* proteins

| <b>Metric</b>                     | <b>Mean [95% CIs]*, %</b> | <b>Range (low-high), %</b> |
|-----------------------------------|---------------------------|----------------------------|
| $\zeta_{\text{hydrophobic}}(t)$ , | 6.32 [5.44, 7.27]         | 0.08 – 32.31               |
| $\zeta_{\text{DnaK}}(t)$          | 14.74 [13.03, 16.47]      | 0.17 – 38.35               |
| $\zeta_{\text{agg}}(t)$           | 11.74 [10.32, 13.22]      | 0.60 – 39.75               |
| $\chi_{\text{func}}$              | 24.58 [22.97, 26.28]      | 9.52 – 55.47               |

\*confidence intervals calculated from bootstrapping  $10^6$  times
