# Supplementary material for: MONITORING OF IODINE-131 IN AIR USING ACTIVATED CHARCOAL
Source: Springer Nature journal article supplement (doi:10.1038/s41467-022-30548-5), 1961-01-01
Supplement: 41467_2022_30548_MOESM2_ESM.pdf [file 41467_2022_30548_MOESM2_ESM.pdf]

### **Description of Additional Supplementary Files**

File Name: Supplementary Data 1

Description: Annotated LiP-MS results for GIpD

File Name: Supplementary Data 2

Description: LiP-MS detected peptides for 1-min timepoint

File Name: Supplementary Data 3

Description: LiP-MS detected peptides for 5-min timepoint

File Name: Supplementary Data 4

Description: LiP-MS detected peptides for 120-min timepoint
